# Supplementary material for: The Management of Clinical Varicocele: Robotic Surgery Approach
Source: Frontiers journal article supplement (doi:10.3389/frph.2022.791330), 2022-03-22
Supplement: Data_Sheet_1.PDF [file Data_Sheet_1.PDF]

| <b>S-STRENGTHS</b>     | <b>W-WEAKNESSES</b> |
|------------------------|---------------------|
| NO HANDS TREMOR        | COSTS               |
| SURGEON ERGONOMICS     |                     |
| THIRD ARM              | FEW DATA AVAILABLE  |
| BETTER VISION          |                     |
| MORE PRECISION         |                     |
| <b>O-OPPORTUNITIES</b> | <b>T-TREATS</b>     |
| NEW TECHNOLOGY         | GENERAL ANESTHESIA  |

Table 1: RALV SWOT Analysis
